# Supplementary material for: Sortilin restricts secretion of apolipoprotein B-100 by hepatocytes under stressed but not basal conditions
Source: JCI journal article supplement (doi:10.1172/jci144334), 2022-02-03
Supplement: sd1 [file 1]

## Supplemental Data

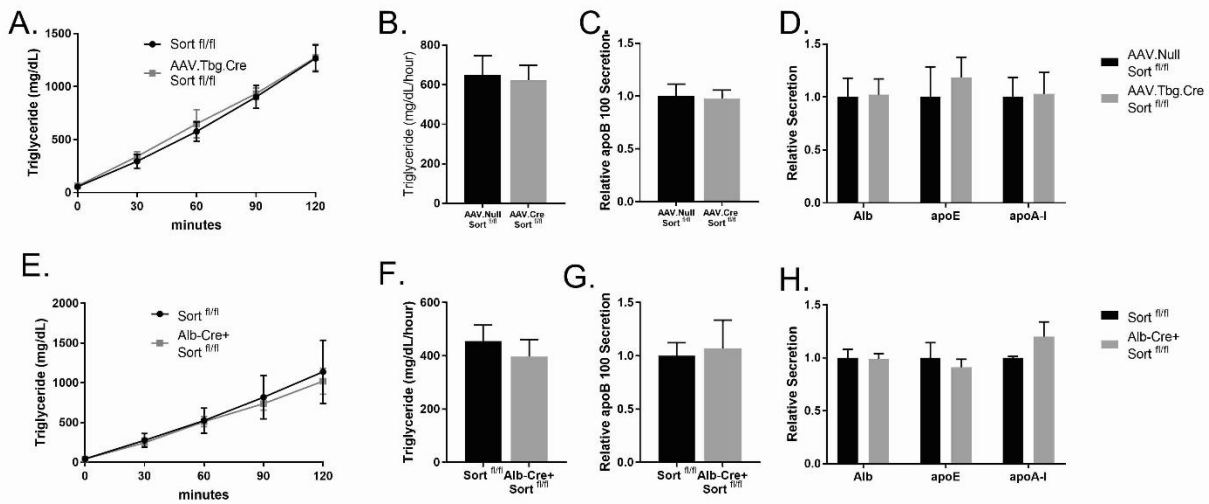

Figure S1- A) 8-10 week old male Sort1<sup>fl/fl</sup> were injected with AAV.Tbg.Cre or null AAV and after 3 weeks mice were injected IV with pluronic and <sup>35</sup>S Met/Cys and bled every 30 minutes for 2hours. Plasma TG was measured B)TG secretion rate was calculated as the mg/dL/hour. C) Total plasma from each mouse from the 2 hour post-injection time point was subjected to autoradiography and <sup>35</sup>S labeled apoB100 and D) <sup>35</sup>S labeled Alb, apoE, and apoA-I bands was counted. N=8/group E) 8-10 week old male Sort1<sup>fl/fl</sup> and AlbCre+Sort1<sup>fl/fl</sup> (LSKO) mice were injected IV with pluronic and <sup>35</sup>S Met/Cys and bled every 30 minutes for 2hours. Plasma TG was measured F)TG secretion rate was calculated as the mg/dL/hour. G) Total plasma from each mouse from the 2 hour post-injection time point was subjected to autoradiography and <sup>35</sup>S labeled apoB100 and H) <sup>35</sup>S labeled Alb, apoE, and apoA-I bands was counted. N=8/group

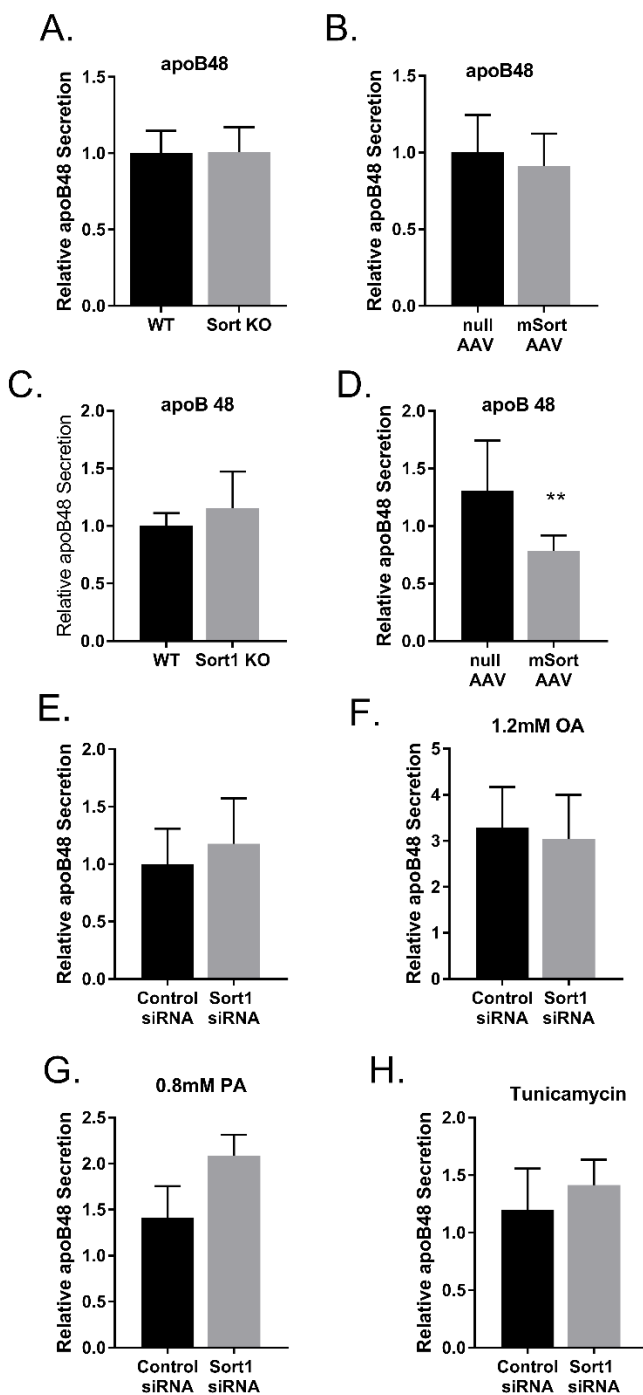

Figure S2 –Newly synthesized apoB48 secreted in A) chow fed Sort1 KO mice and littermate controls B) chow fed C57BL6/J mice treated with Sort1 or null AAV C) High fat diet fed Sort1 KO mice and littermate controls D) High fat diet fed C57BL6/J mice treated with Sort1 or null AAV E) McA cells with Sort1 knockdown F-H) McA cells with Sort1 knockdown treated with 1.2mM oleic acid (F), 0.8mM PA (G), or 1uM Tunicamycin (H)

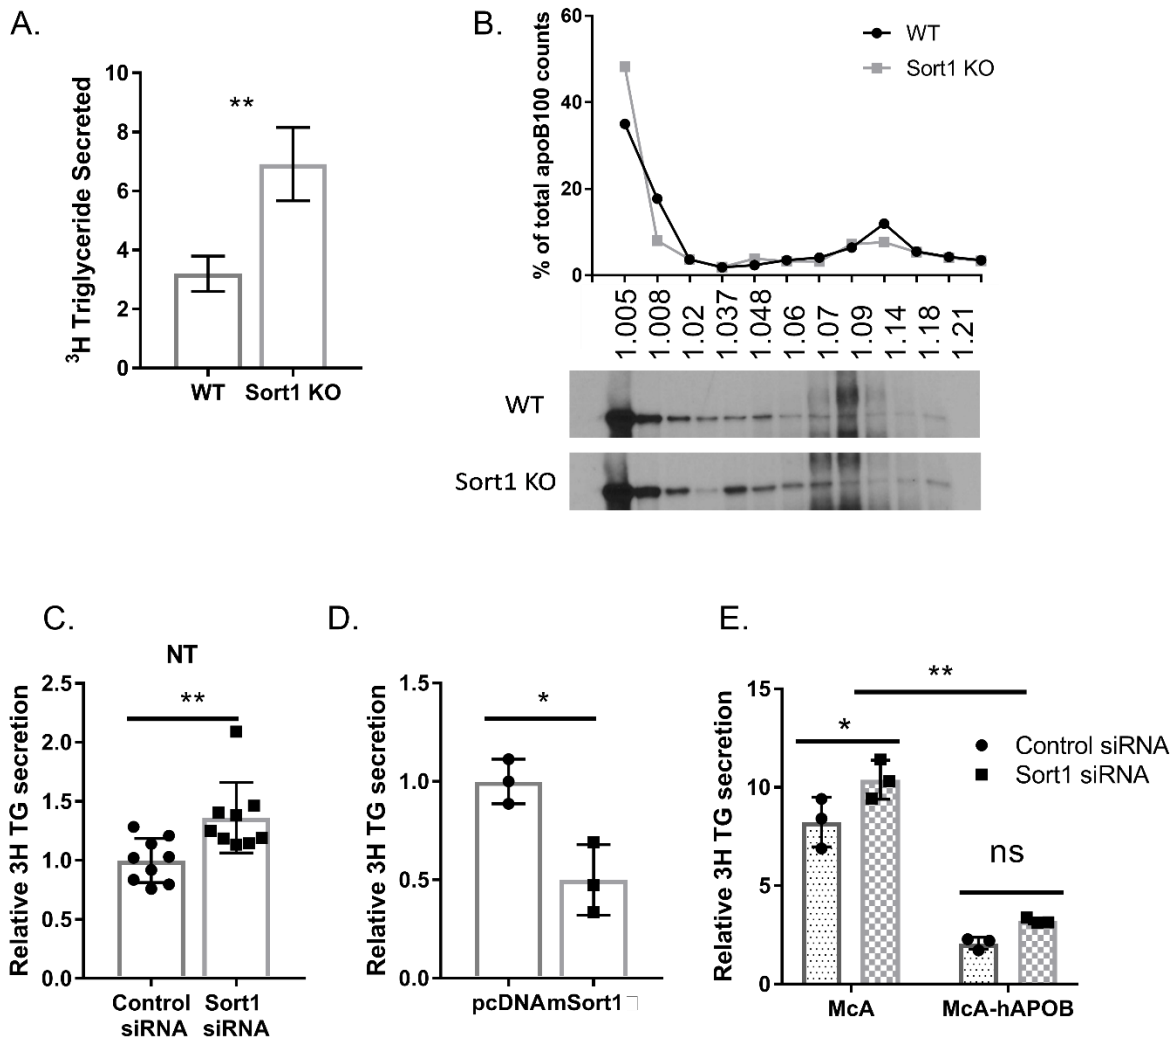

Figure S3- A) Isolated primary hepatocytes from wildtype or Sort1 knockout mice were labeled with with 10uCi of  $^3\text{H}$  glycerol (American Radiolabel Chemicals) for 4 hours in DMEM + 1.5% BSA. The media was collected and subjected to Folch extraction and separated by Thin Layer Chromatography. Separate wells were analyzed for  $^3\text{H}$  activity in TG spot and normalized to total cell protein as measured by BCA assay. \* $P < 0.05$  by student's t test. N=3 wells per mouse from 3 mice/group. B) Isolated primary hepatocytes in a 10cm dish were labeled with  $^{35}\text{S}$  met/cys for 2 hours and the media was collected and separated by density using a sucrose density ultracentrifugation spin. Fractions were then immunoprecipitated with anti-apoB antibody and visualized by autoradiography. C-E) McA-RH7777 (McA) and McA-hAPOB cells were transfected with either Sort1 siRNA or mSort1 or empty control vector (pcDNA) vector and labeled with  $^3\text{H}$  glycerol and  $^3\text{H}$  TG measured as described above. \* $P < 0.05$  by student's t test in panels C and D. \* $P \leq 0.05$  by 1 way ANOVA in panel E, N=3-9 per cell line,

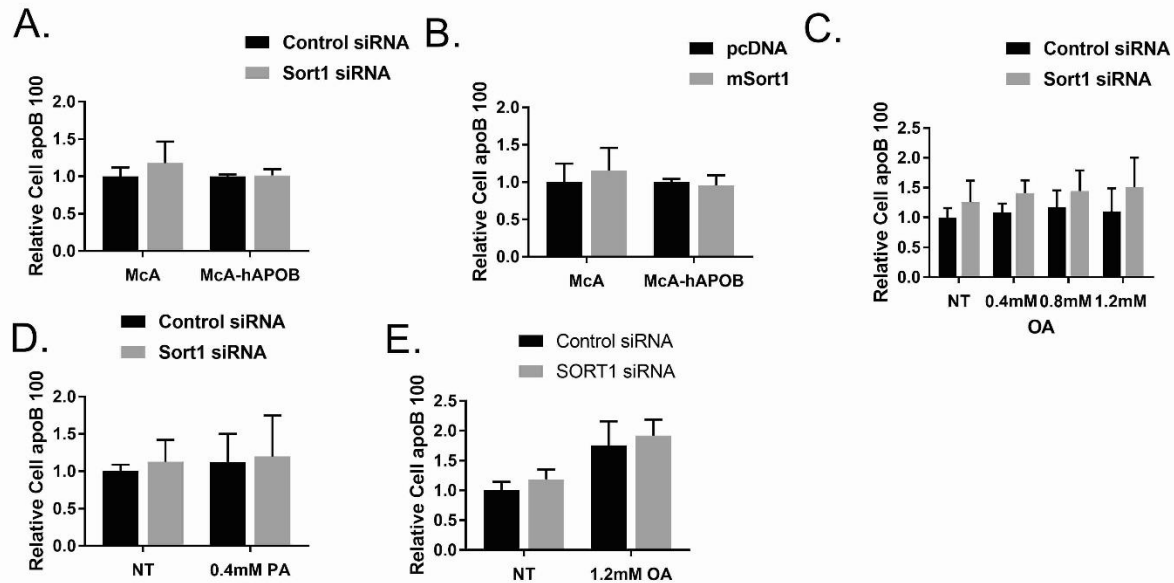

Figure S4- McA-RH7777 (McA) and McA-HAPOB cells were transfected with rSort1 siRNA or control siRNA. After 36 hrs, cells were incubated for 1 hour in DMEM without Met/Cys+1.5% BSA and then labeled in the same media with  $^{35}\text{S}$  Met/Cys for 2 hours. Media was collected and cells were lysed and subjected to autoradiography and  $^{35}\text{S}$  labeled apoB100 were counted and normalized to total  $^{35}\text{S}$  trichloroacetic acid precipitable counts. N=3 wells/group Representative of 3 independent experiments B) McA and McA-HAPOB cells were transfected with mSort1 or control vector (pcDNA) and cell apoB100 was measured as described in panel A N=3 wells/group Representative of 3 independent experiments C) siRNA transfected McA cells were incubated in DMEM without Met/Cys+1.5% BSA with 0(NT), 0.4, 0.8, or 1.2mM Oleic Acid (OA) for 2 hours and then labeled in the same media with  $^{35}\text{S}$  Met/Cys for 2 hours after which cell apoB100 was measured n=9wells/ treatment/ group. D) cell apoB100 from McA cells treated with 0 or 0.4mM Palmitic acid (PA), n=9 well/treatment/group E) cell apoB100 secretion in siRNA transfected HepG2 cells treated with 0 or 1.2mM OA, n=9 well/treatment/group . \* $p < 0.05$  vs control siRNA or pcDNA by ANOVA.

A.

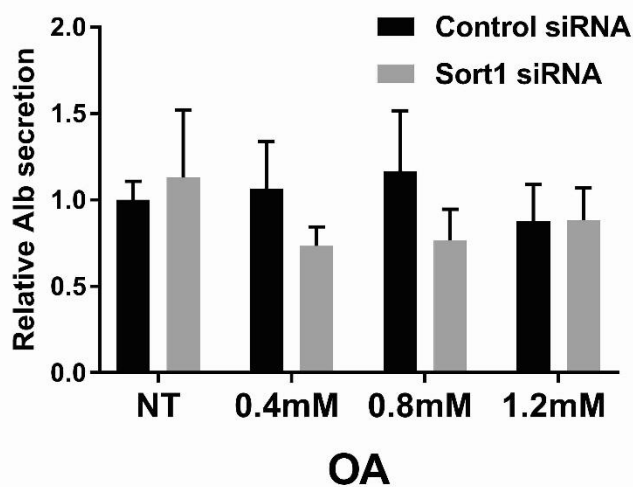

B.

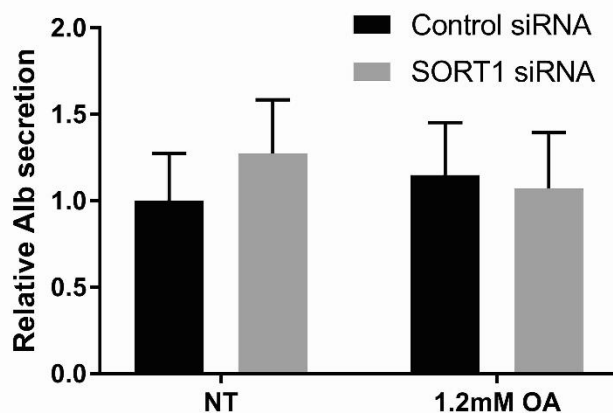

Figure S5- A) McA-RH7777 (McA) cells were transfected with rSort1 siRNA or control siRNA. After 36 hrs, cells were incubated in DMEM without Met/Cys+1.5% BSA with 0(NT), 0.4, 0.8, or 1.2mM Oleic Acid (OA) for 2 hours and then labeled in the same media with  $^{35}\text{S}$  Met/Cys for 2 hours. Media was collected and cells were lysed and subjected to autoradiography and  $^{35}\text{S}$  labeled alb were counted and normalized to total  $^{35}\text{S}$  trichloroacetic acid precipitable counts. N=6 wells/group. B) Alb secretion from HepG2 cells treated with 0 or 1.2mM OA, n=6 well/treatment/group

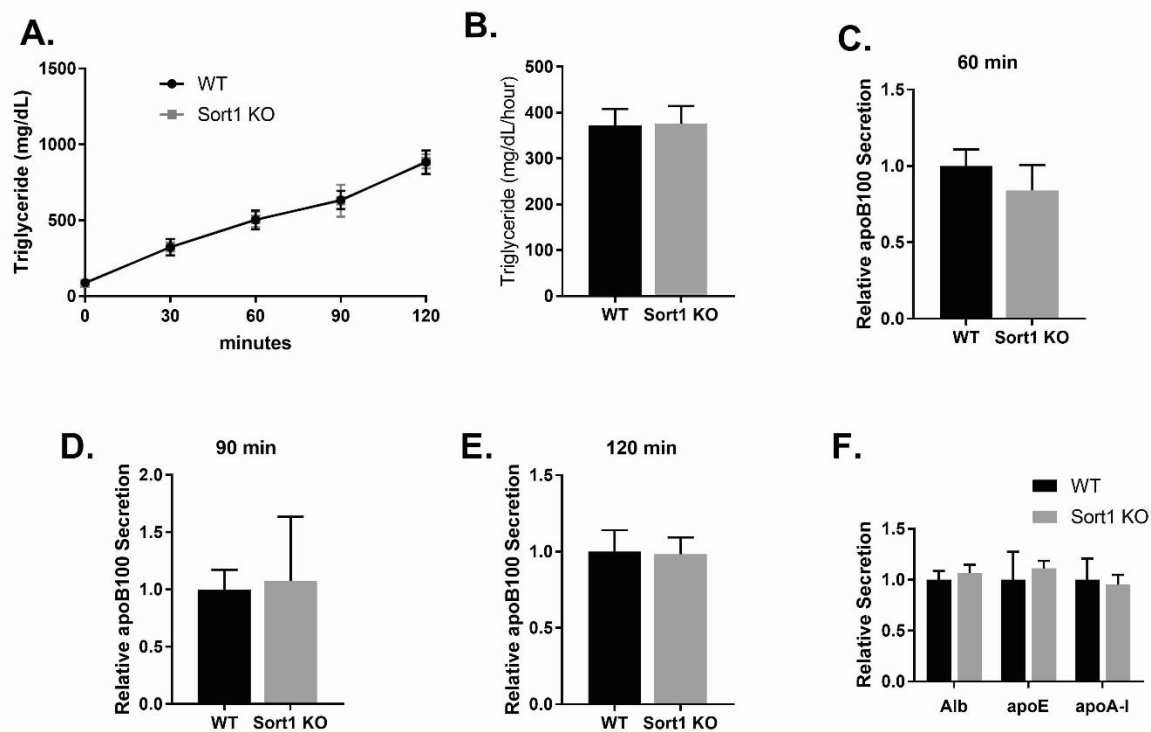

Figure S6- A) 22 week old Sort1 KO mice fed a chow diet were injected IV with pluronic and  $^{35}\text{S}$  Met/Cys and bled every 30 minutes for 2 hours. Plasma TG was measured B) TG secretion rate was calculated as the mg/dL/hour. C-E) Total plasma from each mouse at the post-injection time point was subjected to autoradiography and  $^{35}\text{S}$  labeled apoB100 and F)  $^{35}\text{S}$  labeled Alb, apoE, and apoA-I bands was counted. N=8/group from 2 experiments

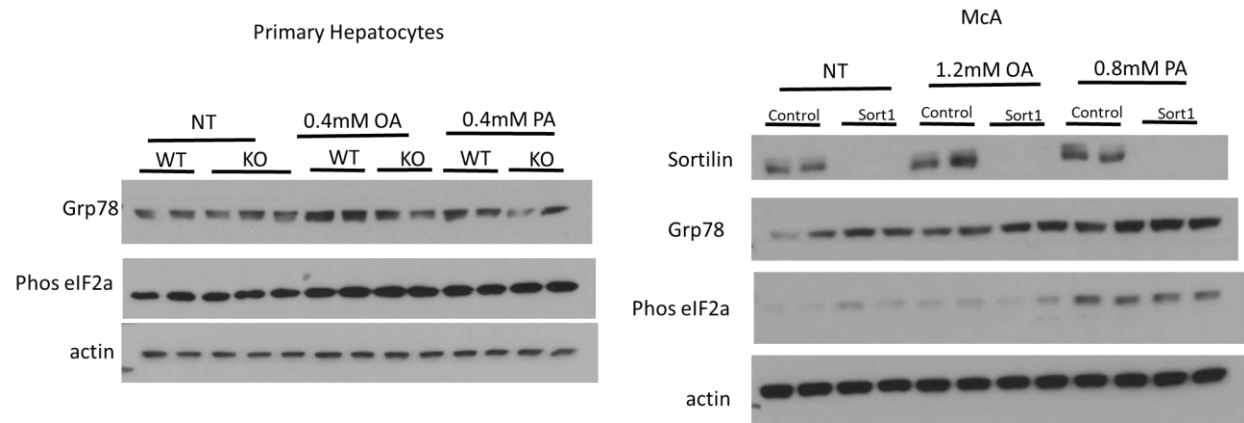

Figure S7 –A) Isolated mouse primary hepatocytes were treated with 0.4mM OA or 0.4mM PA for 4 hours and then were lysed and western blotted for Grp78, phos-eIF2a and actin protein. B) siRNA treated McA cells were incubated with 1.2mM OA or 0.8mM PA for 4 hours and then were lysed and western blotted for Sortilin, Grp78, phos-eIF2a and actin protein.

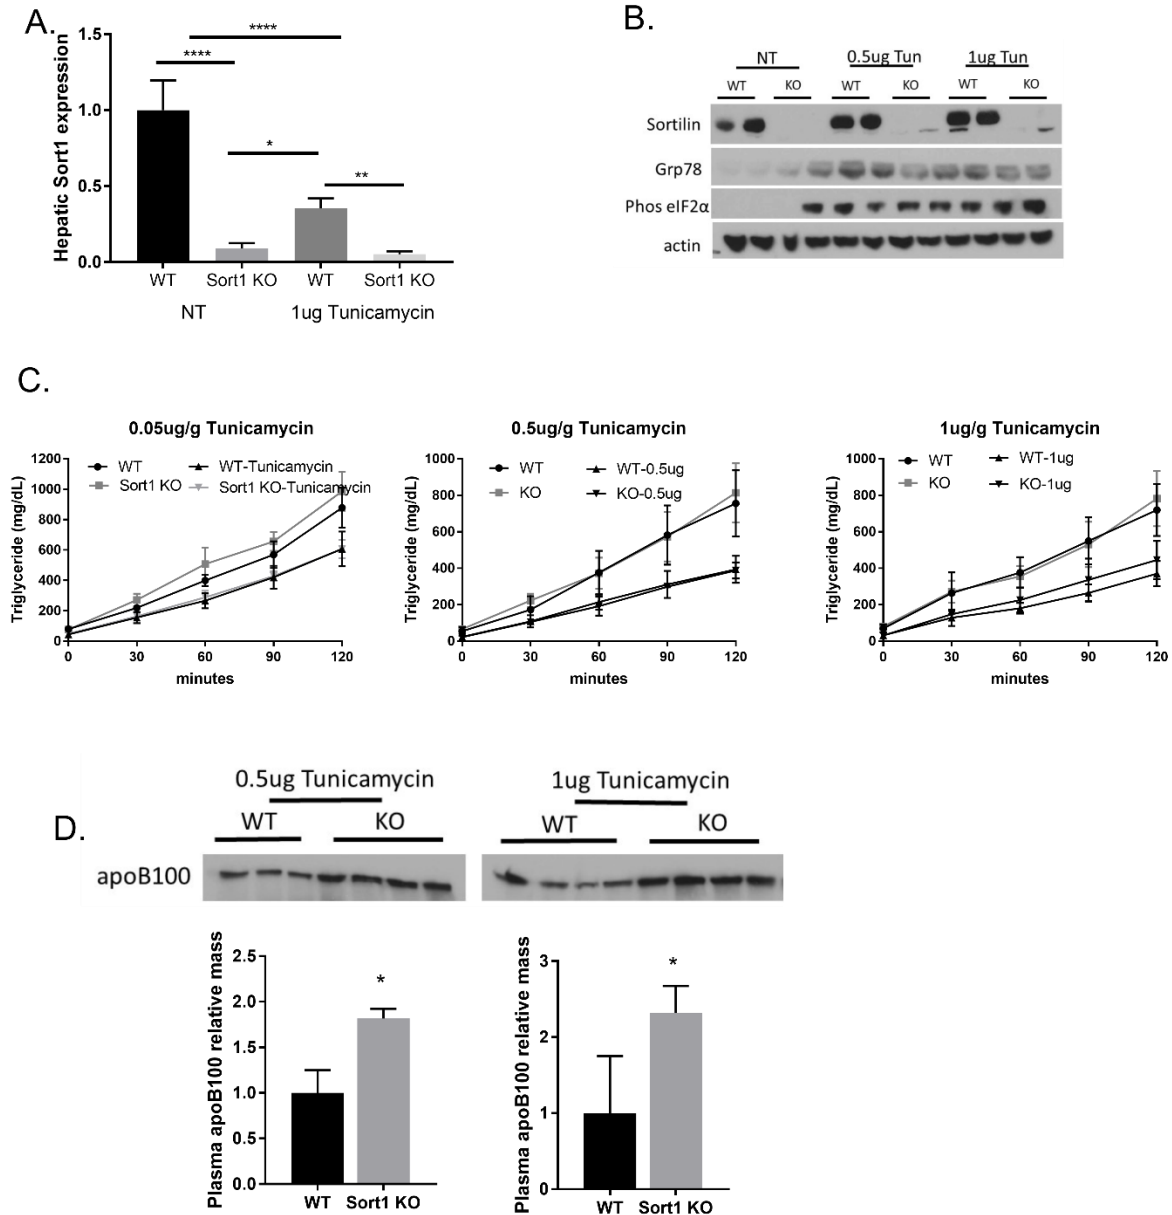

Figure S8 - WT and Sort1 KO mice were injected IP with 0.05, 0.5 or 1ug/g body weight Tunicamycin. After 4 hours, mice were injected with pluronic and bled after 2 hours. A) Liver Sort1 expression was measured, \*  $p < 0.05$  by ANOVA B) Livers were homogenized and western blotted for Sortilin, Grp78, phos-eIF2 $\alpha$  and actin protein. C) Plasma TG was measured D) 2 hour post-pluronic plasma was immunoblotted for apoB and quantified by densitometry. \* $p < 0.05$

Supplemental Table 1

Characterization of 8-12 week old Hepatocyte-Specific *Sort1* Knockout Mice

|                           | chow         |              | chow         |              |
|---------------------------|--------------|--------------|--------------|--------------|
|                           | Flox         | Alb Cre      | Flox         | AAV Cre      |
| <b>Body Weight</b>        | <b>27.04</b> | <b>24.84</b> | <b>32.15</b> | <b>31.32</b> |
| <b>(g)</b>                | 2.01         | 2.95         | 5.1          | 4.23         |
| <b>plasma Cholesterol</b> | <b>73.48</b> | <b>87.5</b>  | <b>90.33</b> | <b>91</b>    |
| <b>(mg/dL)</b>            | 17.9         | 17.06        | 14.01        | 14.62        |
| <b>Plasma TG</b>          | <b>47.15</b> | <b>39.86</b> | <b>55.2</b>  | <b>62.96</b> |
| <b>(mg/dL)</b>            | 3.96         | 18.19        | 13.63        | 20.5         |
| <b>n</b>                  | 11           | 13           | 12           | 12           |
